1

2 **Main Manuscript for**

3 **Bioinformatic and mechanistic analysis of the**  
4 **palmerolide PKS-NRPS biosynthetic pathway from**  
5 **the microbiome of an Antarctic ascidian**

6

7 Nicole E. Avalon;<sup>1</sup> Alison E. Murray;<sup>2</sup> Hajnalka E. Daligault;<sup>3</sup> Chien-Chi Lo;<sup>3</sup> Karen W. Davenport;<sup>3</sup>  
8 Armand E.K. Dichosa;<sup>3</sup> Patrick S.G. Chain;<sup>3</sup> Bill J. Baker<sup>1</sup>

9

10 <sup>1</sup>Department of Chemistry, University of South Florida, Tampa, FL 33620

11 <sup>2</sup>Division of Earth and Ecosystem Sciences, Desert Research Institute, Reno, NV 89512

12 <sup>3</sup>Los Alamos National Laboratory, Los Alamos, NM 87545

13

14 **Corresponding author:**

15 Bill J. Baker, Department of Chemistry, University of South Florida, Tampa, FL 33620, USA. +1-  
16 813-974-1967, [bjbaker@usf.edu](mailto:bjbaker@usf.edu)

17

18 **Author Contributions:** This work was the result of a team effort in which the following  
19 contributions are recognized: conceptualization, A.E.M., P.S.G.C., and B.J.B.; methodology and  
20 experimentation, N.E.A., A.E.M., H.E.D., C.L., P.S.G.C., B.J.B; data analysis, N.E.A., A.E.M.,  
21 H.E.D, C.L., K.W.D., A.E.K.D., P.S.G.C, B.J.B; data curation, N.E.A., A.E.M., H.E.D, C.L.,  
22 P.S.G.C, B.J.B; original draft preparation, N.E.A., B.J.B., A.E.M., H.E.D.; review and editing,  
23 N.E.A., B.J.B., A.E.M., C.L., H.E.D., P.S.G.C., A.E.K.D; funding acquisition, A.E.M., P.S.G.C.,  
24 and B.J.B. All authors have read and agreed to the published version of the manuscript.

25

26 **Competing Interest Statement:** The authors have no competing interests to disclose.

27

28 **Classification:** Biological sciences, environmental sciences and ecology

29

30 **Keywords:** microbial biosynthesis, secondary metabolites, Antarctic microbiology, *trans*-AT Type  
31 I polyketide synthase, marine natural products

32

33 **This PDF file includes:**

34 Main Text.  
35 Figures 1 to 4.

36

37 **Abstract**

38 Polyketides are a complex family of natural products that often serve competitive or pro-  
39 survival purposes but can also demonstrate bioactivity in human diseases as, for example  
40 cholesterol lowering agents, anti-infectives, or anti-tumor agents. Marine invertebrates and  
41 microbes are a rich source of polyketides. Palmerolide A, a polyketide isolated from the Antarctic  
42 ascidian *Synoicum adareanum*, is a vacuolar-ATPase inhibitor with potent bioactivity against  
43 melanoma cell lines. The biosynthetic gene clusters (BGC) responsible for production of  
44 secondary metabolites are encoded in the genomes of the producers as discrete genomic  
45 elements. A putative palmerolide BGC was identified from a *S. adareanum* metagenome based  
46 on a high degree of congruence with a chemical structure-based retrobiosynthetic prediction.  
47 Protein family homology analysis, conserved domain searches, and active site and motif  
48 identification were used to identify and propose the function of the 75 kb *trans*-acyltransferase  
49 (AT) polyketide synthase-non-ribosomal synthase (PKS-NRPS) domains responsible for the  
50 synthesis of palmerolide A. Though PKS systems often act in a predictable co-linear sequence,  
51 this BGC includes multiple *trans*-acting enzymatic domains, a non-canonical condensation  
52 termination domain, a bacterial luciferase-like monooxygenase (LLM), and multiple copies found  
53 within the metagenome-assembled genome (MAG) of *Candidatus* *Synoicohabitans*  
54 *palmerolidicus*. Detailed inspection of the five highly similar pal BGC copies suggests the  
55 potential for biosynthesis of other members of the palmerolide chemical family. This is the first  
56 delineation of a biosynthetic gene cluster from an Antarctic species. These findings have  
57 relevance for fundamental knowledge of PKS combinatorial biosynthesis and could enhance drug  
58 development efforts of palmerolide A through heterologous gene expression.

59 **Significance Statement**

60 Complex interactions exist between microbiomes and their hosts. Increasingly, defensive  
61 metabolites that have been attributed to host biosynthetic capability are now being recognized as  
62 products of associated microbes. These unique metabolites often have bioactivity in targets of  
63 human disease and can be purposed as pharmaceuticals. The molecular machinery for  
64 production of palmerolide A, a macrolide that is potent and selective against melanoma, was  
65 discovered as a genomic cluster in the microbiome of an Antarctic ascidian. Multiple non-identical  
66 copies of this genomic information provide clues to differences in specific enzymatic domains and  
67 point to Nature's ability to perform combinatorial biosynthesis *in situ*. Harnessing this genetic  
68 information may pave a path for development of a palmerolide-based drug.

69

70 **Introduction**

71

72 Marine invertebrates such as corals, sponges, mollusks, and ascidians, are known to be  
73 a rich source of bioactive compounds (1). Due to their sessile or sluggish nature, chemical  
74 defenses such as secondary metabolites are often key to their survival. Many compound classes  
75 are represented among benthic invertebrates including terpenes, nonribosomal peptide synthase  
76 (NRPS) products, ribosomally synthesized and post-translationally modified peptides (RiPPs),  
77 and polyketides. It is estimated that that over 11,000 secondary metabolites from marine and

78 terrestrial environments understood to be of polyketide synthase (PKS) and NRPS origin have  
79 been isolated and described (2). Biosynthetic gene clusters (BGCs) exist as a series of genomic  
80 elements that encode for megaenzymes responsible for production of these secondary  
81 metabolites. BGCs can have distinct nucleotide composition properties such as codon usage and  
82 guanine-cytosine content that do not match the remainder of the genome (3, 4), suggesting a  
83 mechanism of transfer from organisms that are only distantly related, perhaps even from  
84 interkingdom horizontal gene transfer (5, 6). Interestingly, the BGCs for many natural products  
85 isolated from marine invertebrates are found in the host-associated microbiota, reflecting the role  
86 of these compounds in symbiosis (7).

87 Polyketides are a complex family of natural products produced by a variety of PKS  
88 enzymes that are related to, but evolutionarily divergent from, fatty acid synthases (8). They often  
89 possess long carbon chains with varied degrees of oxidation, can contain aromatic components,  
90 and may be either cyclic or linear. It is estimated that of the polyketides that have been isolated  
91 and characterized, 1% have potential biological activity against human diseases, making this  
92 class of compounds particularly appealing from a drug discovery and development standpoint (9).  
93 This potential for use as pharmaceuticals is approximately five times greater than for compounds  
94 of all other natural product classes (9). Many polyketides are classified as macrolides, which are  
95 large-ring lactones that are pharmaceutically relevant due to a number of biological actions,  
96 including, for example, targeting the cytoskeleton, ribosomal protein biosynthesis, and vacuolar  
97 type V-ATPases (10–13). V-ATPases are responsible for acidification of cells and organelles via  
98 proton transport across membranes, including those of lysosomes, vacuoles, and endosomes.  
99 These enzymes appear to have an impact on angiogenesis, apoptosis, cell proliferation, and  
100 tumor metastasis (10). A number of marine macrolides inhibit V-ATPases, including  
101 lobatamides, chondropsins, lejimalides, and several of the palmerolides (14–18).

102 There are three types of PKS systems. Type I PKS systems in bacteria are primarily  
103 comprised of non-iteratively acting multimodular enzymes that lead to progressive elongation of a  
104 polyketide chain, though these megaenzymes can also include “stuttering” modules that may act  
105 iteratively (19–21). In addition, some bacterial Type I PKS systems are comprised solely of  
106 iteratively acting monomodular enzymes that catalyze a series of chain elongation steps for  
107 polyketide formation (22). Type II PKS systems typically contain separate, iteratively acting  
108 enzymes that biosynthesize polycyclic aromatic polyketides, while Type III PKS systems possess  
109 iteratively-acting homodimeric enzymes that often result in monocyclic or bicyclic aromatic  
110 polyketides (19). Type I PKS systems can be subdivided into two groups, depending upon  
111 whether the acyl transferase (AT) modules are encoded within each module at the site that is  
112 parallel to the functional role of the ATs, as in *cis*-AT Type I PKS, or physically distinct from the  
113 megaenzyme, as in *trans*-AT Type I PKS. In both cases, there are often parallel relationships  
114 between the genome order, the action of enzymatic modules, and the functional groups present  
115 in the growing polyketide chain, though in *trans*-AT systems deviations from these parallel  
116 relationships is more likely to be observed (23). In *trans*-AT systems, AT domains may be  
117 incorporated in a mosaic fashion through horizontal gene transfer (23). This introduces greater  
118 molecular architectural diversity over evolutionary time, as one clade of *trans*-ATs may select for  
119 a malonyl-CoA derivative, while the *trans*-AT domains in another clade may select for unusual or  
120 functionalized subunits (24, 25). Additionally, recombination, gene duplication, and conversion  
121 events can lead to further diversification of the resultant biosynthetic machinery (26). Predictions  
122 regarding the intrinsic relationship between a secondary metabolite of interest, the biosynthetic  
123 megaenzyme, and the biosynthetic gene cluster (BGC) can be harnessed for natural product  
124 discovery and development (27–29).

125 In the search for new and bioactive chemotypes as inspiration for the next generation of  
126 drugs, underexplored ecosystems hold promise as biological and chemical hotspots (30). The  
127 vast Southern Ocean comprises one-tenth of the total area of Earth’s oceans and is largely  
128 unstudied for its chemodiversity. The coastal marine environment of Antarctica experiences  
129 seasonal extremes in, for example, ice cover, light field, and food resources. Taken with the  
130 barrier to migration imposed by the Antarctic Circumpolar Current and the effects of repeated

131 glaciation events on speciation, a rich and endemic biodiversity has evolved, with consequent  
132 potential for new chemodiversity (30–32).

133 Palmerolide A (**Fig. 1**) is the principal secondary metabolite isolated from *Synoicum*  
134 *adareanum*, an ascidian which can be found in abundance at depths of 10 to 40 m in the coastal  
135 waters near Palmer Station, Antarctica (17). Palmerolide A is a macrolide polyketide that  
136 possesses potent bioactivity against malignant melanoma cell lines while demonstrating minimal  
137 cytotoxicity against other cell lines (17). The NCI's COMPARE algorithm was used to correlate  
138 experimental findings with a database for prediction of the biochemical mechanism by identifying  
139 the mechanism of action of palmerolide A as a vacuolar-ATPase (V-ATPase) inhibitor (33).  
140 Downstream effects of V-ATPase inhibition include an increase in both hypoxia induction factor-  
141  $1\alpha$  and autophagy (17, 34). Increased expression of V-ATPase on the surface of metastatic  
142 melanoma cells (34) perhaps explain palmerolide A's selectivity for UACC-62 cell lines over all  
143 cell types (17). Despite the relatively high concentrations of palmerolide A in the host tissue  
144 (0.49–4.06 mg palmerolide A  $\times$  g<sup>-1</sup> host dry weight) (35), isolation of palmerolide A from its  
145 Antarctic source in mass sufficient for drug development it is not ecologically nor logistically  
146 feasible. Synthetic strategies for the synthesis of palmerolide A have been reported (6–13),  
147 though a clear pathway to quantities needed for drug development has been elusive. Therefore,  
148 there is substantial interest in identifying the biosynthetic gene cluster (BGC) responsible for  
149 palmerolide A production.

150 Our approach to identify the palmerolide BGC (*pal* BGC) began with the characterization  
151 of the host-associated microbiome (43). The core microbiome for *Synoicum adareanum*, a  
152 persistent cohort of bacteria present in many individual ascidians, was established through  
153 analysis of occurrence of distinct amplicon sequence variants (ASV) from the iTag sequencing of  
154 the Variable 3-4 regions of the bacterial 16S rRNA (35). This ultimately led to the evaluation of  
155 the metagenome and then the assembly of the metagenome assembled genome (MAG) of  
156 *Candidatus* *Synoicohabitans palmerolidicus*, a verrucomicrobium in the family *Opitutaceae* (44).  
157 Contained within the genome are five non-identical copies of the *pal* BGC, of which, three  
158 correlate with palmerolides, the structures of which have been previously discovered in this  
159 macrolide family. Here we report a detailed analysis of the *pal* BGCs.

160

## 161 **Results and Discussion**

162

### 163 **A. Retrobiosynthetic Scheme for Palmerolide A**

164

165 A retrobiosynthetic scheme of the *pal* BGC was developed based on the chemical structure  
166 for palmerolide A, including modules consistent with a hybrid PKS-NRPS with tailoring enzymes  
167 for key functional groups (**Fig. 1**). We hypothesized that the initial module would be PKS-like in  
168 nature to utilize 3-methylcrotonic acid as the starter unit followed by a NRPS domain for the  
169 incorporation of glycine. PKS elongation was predicted to be an 11-step sequence resulting in 22  
170 contiguous carbons. Modifying enzymes that are encoded co-linearly were predicted to create the  
171 architectural diversity with olefin placement, reduction of certain carbonyl groups to secondary  
172 alcohols, and full reduction of other subunits. In addition, incorporation of methylmalonyl CoA or  
173 enzymatic activity of carbon methyltransferases (cMTs) were predicted to be responsible for the  
174 placement of methyl groups C-26 and C-27 from S-adenosylmethionine (SAM).

175 Several key structural features proposed to result from the action of *trans*-acting enzymes  
176 are present. As seen in the kalimantacins (45), the carbamate on C-11 was hypothesized to be  
177 installed by a carbamoyl transferase (CT). The C-25 methyl group is located on C-17, in the  $\beta$ -  
178 position. This structural feature suggests the origin of this branch from hydroxymethylglutaryl-CoA  
179 Synthase (HCS) catalysis, rather than the SAM-mediated methylation occurring at the  $\alpha$ -position,  
180 which appears to be the origin of the C-26 and C-27 methyl groups. Methylation in this acetate  
181 carboxyl position is unusual, but represented in a number of notable BGC's, such as those of the  
182 jamaicamides, bryostatins, curacin A, oocydin, pederin, and psymberin, among others; in  
183 biochemically characterized Type I PKS BGCs, HCS-mediated  $\beta$ -branch formation is the common  
184 mechanism (46–50). The hydroxy group on C-10, in the  $\alpha$ -position of the acetate subunit, was

185 hypothesized to result from elongation resulting from hydroxymalonyl-CoA incorporation or from  
186 the action of a hydroxylase at a later stage of biosynthesis.

187

## 188 **B. Proposed Biosynthesis and Architecture of the Putative *pal* Biosynthetic Gene Cluster**

189

190 *Synoicum adareanum* collected near Palmer Station, Antarctica was processed to separate  
191 eukaryotic from prokaryotic cells of the host microbiome. Iterations of metagenomic analysis (44)  
192 yielded a large number of BGCs when analyzed via the antiSMASH annotation platform (51). A  
193 candidate cluster with multiple copy numbers was identified and has excellent congruence with  
194 retrobiosynthetic predictions, including the key genomic markers outlined above that are likely  
195 involved in biosynthesis of palmerolide A. Integration of BGC annotations with information from  
196 protein family homology analysis, conserved domain searches, active site and motif identification,  
197 supported the hypothesis that this putative 75 kb BGC is responsible for palmerolide A  
198 production. The core scaffold was explained by the NRPS and *trans*-AT PKS hybrid system. In  
199 addition, each of the tailoring enzymes that are expected for the distinct chemical features are  
200 encoded in the genome. The proposed BGC for palmerolide A is comprised of 14 core  
201 biosynthetic modules and 25 genes in a single operon of 74,655 bases (**Fig. 2**). Fourteen  
202 modules are co-linear and two *trans*-AT domains (modules 15 & 16) follow the core biosynthetic  
203 genes. Additional *trans*-acting genes contribute to backbone modifications with at least one gene  
204 contributing to post-translational tailoring (**Fig. 3**).

205

206 **An unusual starter unit and NRPS domains of *palA*.** Bioinformatic analysis of the gene  
207 sequence suggests that the initial core biosynthetic domains of *palA* (modules 1 and 2) encode  
208 for the requisite acyl carrier proteins (ACP) (**Fig. 2**). Encoded in module 1, there are three ACPs  
209 in tandem, which could serve to promote an increase in metabolite production (52). The second in  
210 series is an ACP- $\beta$  containing the conserved domain sequence GXDS (53) and is likely the  
211 acceptor of a starter unit containing a  $\beta$ -branch, consistent with the proposed starter unit for  
212 palmerolide A, 3-methylcrotonic acid. While both *trans*-acting ATs, PalE and PalF, (**Fig. 2**)  
213 possess the catalytic active site serine which is key for the proper positioning of subunit within the  
214 hydrophobic cleft of the active site (8, 54), only the first AT, PalE, has a characteristic motif that  
215 includes an active site phenylalanine, conferring specificity for malonate selection (55). The AT  
216 selecting the methylcrotonic acid starter unit is likely the second of the two *trans*-AT domains  
217 (PalF), which lacks definitive specificity for malonyl-CoA. In support, some *trans*-acting ATs have  
218 demonstrated affinity for a wider range of substrates than their *cis*-acting counterparts (26, 56). 3-  
219 Methylcrotonyl-CoA is an intermediate of branched-chain amino acid catabolism in leucine  
220 degradation; intermediates of which can be diverted to secondary metabolite production (57).  
221 Interestingly, an upregulation of leucine catabolic pathways can be seen as a mechanism of cold  
222 adaption to maintain cell wall fluidity via production of branched chain fatty acids, a factor which  
223 may be at play in this Antarctic microorganism (57, 58). The subsequent NRPS module  
224 containing condensation (C) and adenylation (A) domains as well as a carrier protein comprise  
225 module 2. Signature sequence information and NRSPredictor2 method (51, 59) of the A domain  
226 are consistent with selection of a glycine residue. These domains incorporate the amino acid  
227 residue, resulting in the addition of a nitrogen and two carbons in this step of the biosynthesis of  
228 palmerolide A.

229 In a non-canonical fashion, the carrier proteins flanking the NRPS modules do not appear  
230 to be the expected ACP and PCP for module 1 and 2, respectively. The carrier protein following  
231 the KS domain in module 1 was initially annotated as a non- $\beta$ -branching ACP; however,  
232 phylogenetic analysis with the amino acid sequences of carrier proteins from other hybrid PKS-  
233 NRPS systems, demonstrates that this carrier protein is in the same clade as peptidyl-carrier  
234 proteins (**SI Appendix, Fig. S1**). The carrier protein associated with module 2 which was initially  
235 annotated simply as a phosphopantetheine attachment site (Pfam00550.24) is found to be more  
236 phylogenetically-related to ACPs within PKS-NRPS systems (**SI Appendix, Fig. S1**). Notably, it  
237 possesses the (D/E)xGxDSL motif for phosphopantetheine arm attachment (60) with the  
238 exception of an isoleucine rather than leucine in the final position of the motif, a residue seen in

239 this position in other ACPs from hybrid PKS-NRPS systems (**SI Appendix, Fig. S2**). Typically, a  
240 PCP would follow the domains in NRPS-like modules; however, there are exceptions in the  
241 literature. For example, the BGCs for both coralopyronin and oxazolamycin contain ACPs  
242 following an A domain (61, 62). This non-canonical finding could point to the acquisition of these  
243 domains over time, as the carrier protein for module 1 is encoded in *paIA*, the same gene as the  
244 proteins for both modules 1 and 2, whereas the carrier protein for module 2 is encoded at the  
245 beginning of *paIB*, a gene which encodes for only PKS domains (**Fig. 2**).

246  
247 **Contiguous PKS chain and *trans*-acting enzymes at site of action for *paIB* – *paID*.** The  
248 contiguous carbon backbone of palmerolide A arises from 11 cycles of elongation from a series of  
249 modules with a variety of enzymatic domains that include an ACP, KS, and associated genes that  
250 establish the oxidation state of each subunit (**Fig 2**). The first module of *paIB* (module 3) includes  
251 a dehydratase (DH) and cMT domains, a sequence which results in a chain extension  
252 modification to an  $\alpha,\beta$ -unsaturated thioester, a result of the action of the encoded DH. The  
253 expected KR domain that would be responsible for the  $\Delta^{22}$  olefin (**Fig. 2**) is not present. The  
254 BGCs for bryostatin 1, coralopyronin, and sorangicin also lack an accompanying KR domain to  
255 work in concert with an encoded DH. The unaccompanied DH in the first two systems are  
256 deemed inactive; however, an olefin results from the DH in the absence of an accompanying KR  
257 in both modules 9 and 11 of the sorangicin BGC (46, 61, 63). The subsequent cMT methylation is  
258 consistent with an *S*-adenosylmethionine (SAM)-derived methyl group, as expected for C-27 in  
259 palmerolide A. Module 4, spanning the end of *paIB* and beginning of *paIC*, includes a DH, a  
260 ketoreductase (KR), and another cMT domain. This cluster of domains is predicted to result in the  
261 methyl-substituted conjugated diene of the macrolide tail (C-19 through C-24, C-26 on  
262 palmerolide A).

263 The substrate critical for macrolactonization of the polyketide is the C-19 hydroxy group, a  
264 result of the KS and KR domains encoded in module 5 (**Fig. 2**). Additionally, a domain initially  
265 annotated as a dehydratase (DHt) at this location may contribute to the final cyclization and  
266 release of the molecule from the megaenzyme by assisting the terminal C domain with ring  
267 closure (53). This sequence shows some homology with condensation domains and does not  
268 possess the hotdog fold that is indicative of canonical dehydratases, and therefore, may not truly  
269 represent a DH (64). Alternatively, this domain could be responsible for the olefin shifts to the  $\beta,\gamma$ -  
270 positions, as seen in bacillaene and ambruticin biosynthesis (65, 66).

271 Only an enoyl-CoA hydratase (ECH) in addition to standard ACP and KS is encoded in  
272 module 6 which would lead to a ketone function; based on our retrobiosynthetic analysis, the  
273 resulting ketone at C-17 is the necessary substrate for HCS-catalyzed  $\beta$ -branch formation,  
274 resulting in the C-25 methyl group on C-17. The HCS cassette (PaIK through PaIO) is comprised  
275 of a series of *trans*-acting domains, including an ACP, an HCS, a free KS, and 2 additional ECH  
276 modules (**Fig. 2**). The HCS cassette can act while the elongating chain is tethered to an ACP  
277 module, rather than after cyclization and release (67, 68). The two ECHs in the HCS cassette  
278 along with the ECH encoded in-line with the core biosynthetic genes would be responsible for  
279 isomerization of a terminal methylene to the observed internal olefin. An HCS cassette formed by  
280 the combination of a *trans*-KS and at least one ECH module with an HCS domain is reported in  
281 several other bacterial BGCs such as bryostatin 1, calyculin A, jamaicamide, mandelalide,  
282 phormidolide, and psymberin (47, 50, 53, 69–71). The domain structure for the HCS cassettes  
283 has a remarkably high degree of synteny across these diverse BGCs (72).

284 There is substantial similarity in the domain structure of module 7, module 10, and module  
285 13, which each include a KS, DH, and KR (**Fig. 2**). The olefin that arises from the action of  
286 module 7, concomitant with carbon chain elongation, is conjugated with the  $\Delta^{16}$  olefin adjacent  
287 the C-17  $\beta$ -branch. Modules 10 and 13 have similar enzymatic composition to 7 and are likely  
288 responsible for  $\Delta^8$  and  $\Delta^2$  olefins. The combination of KR and DH domains are also found in  
289 modules 8 and 12; however, in concert with an unidentified *trans*-acting enoyl reductase domain  
290 (ER), these olefins would be reduced to fully saturated monomeric subunits. There are some  
291 examples of *trans*-acting ER domains carrying out this function, including OocU in oocydin, SorN  
292 in sorangicin, and MndM in mandelalide (49, 63, 71), while in other systems, such as

293 corallopyronin and leinamycin, the reductions of the olefins are largely unexplained (61, 73). The  
294 reduction by a *trans*-acting enzyme often occurs while the elongating polyketide is tethered to the  
295 megaenzyme, as evidenced by the downstream specificity of the KS module for Claisen-type  
296 condensation with subunits containing single or double bonds (63).

297 The genetic architecture for the biosynthesis of two functional groups, essential for bioactivity,  
298 is encoded in module 9 (**Fig. 2**); structure-activity relationship studies demonstrate the  
299 importance of the C-10 hydroxyl group and the C-11 carbamate (74). The KR domain that is  
300 present, predicting the C-11 alcohol function, serves as the substrate for the carbamoyl  
301 transferase (*pa/Q*) in a post-translational modification (75–77). Intriguingly, a domain annotated  
302 as a luciferase-like monooxygenase (LLM) initially seems out of place; however, palmerolide A  
303 has a hydroxy group at C-10, which is the  $\alpha$ -position of the acetate subunit inserted in module 9.  
304 LLMs associated with BGCs may not serve as true luciferases, but instead demonstrate oxidizing  
305 effects on polyketides and peptides without evidence of corresponding bioluminescence (78, 79).  
306 For example, there is an overrepresentation of LLMs in *Candidatus* Entotheonella BGCs without  
307 known bioluminescence (80). As demonstrated through individual inactivation of the LLM in the  
308 BGC of mensacarin, a Type II PKS system, Msn02, Msn04, and Msn08 have key activity as  
309 epoxidases and hydroxylases (79). There are several examples of LLMs in modular Type I PKS  
310 systems. OnnC from onnamide and NazB from nazumamide are two LLMs in *Candidatus*  
311 Endotheonella that are proposed to serve biosynthetically as hydroxylases (80). In calyculin and  
312 mandelalide, the CalD and MndB LLMs catalyze chain shortening reactions through  $\alpha$ -  
313 hydroxylation and Baeyer-Villiger-type oxidation reactions (69, 71). Phormidolide has a LLM that  
314 adds a hydroxy group which is then hypothesized to attack an olefin through a Michael-type  
315 addition for cyclization with enzymatic assistance from a pyran synthase (53). The hydroxylation  
316 that is key in cyclization of oocydin A is likely installed by OocK or OocM, flavin-dependent  
317 monooxygenases that are contiguous to the PKS genes and are thought to act while the  
318 substrate is bound to a portion of the PKS megaenzyme (49). It is this hydroxylase activity that  
319 we propose for the LLM in module 9. Since the producing bacteria is yet to be cultured, it is not  
320 established whether this LLM may also serve a role in bioluminescence and/or quorum sensing.  
321 Further evidence for the role of the LLM is provided through alignment against other LLM's. The  
322 *pa/* BGC contains both LuxR family transcriptional regulator as well as the DNA-binding response  
323 regulator. In addition to the annotation within Pfam00296, which includes the bacterial LLMs, the  
324 sequence is homologous with the multiple sequence alignments and the hidden Markov models  
325 of the TIGR subfamily 04020 of the conserved protein domain family cl19096, which is noted for  
326 natural product biosynthesis LLMs (80). The subfamily occurs in both NRPS and PKS systems as  
327 well as small proteins with binding of either flavin mononucleotide or coenzyme F420. Alignment  
328 of the LLMs from multiple PKS systems, including palmerolide A, shows homology with model  
329 sequences from the TIGR subfamily 04020 (**SI Appendix, Fig. S3**).

330 The addition of C-5 and C-6 and the reduction of the  $\beta$ -carbonyl to form the C-7 hydroxy  
331 group of palmerolide A, is due to module 11, which possesses a KR domain in addition to  
332 elongating KS (**Fig. 2**). In the structure of palmerolide A this is followed by the fully reduced  
333 subunit from module 12 as discussed above. The final elongation results from module 13, which  
334 includes DH and KR domains that contribute to the conjugated ester found as palmerolide A's C-  
335 1 through C-3, completing the palmerolide A C<sub>24</sub> carbon skeleton.

336  
337 **Noncanonical termination condensation domain in *paID* for product cyclization and**  
338 **release.** Typically, PKS systems terminate with a thioesterase (TE) domain, leading to release of  
339 the polyketide from the megaenzyme (71, 81–83). This canonical domain is not present in the *pa/*  
340 cluster. Instead, the final module in the *cis*-acting biosynthetic gene cluster includes a truncated  
341 condensation domain comprised of 133 amino acid residues; compared to the approximately 450  
342 residues that comprise a standard condensation domain (84) (**Fig. 2**). Condensation domains  
343 catalyze cyclization through ester formation in free-standing condensation domains that act in  
344 *trans* as well as in NRPS systems (85, 86). In addition, this non-canonical termination domain is  
345 not without precedent in hybrid PKS-NRPS and in PKS systems, as basiliskamide and  
346 phormidolide both include condensation domains for product release (53, 87). Though the

347 terminal condensation domain in the *pal* BGC is truncated, it maintains much of the HHXXDDG  
348 motif (**SI Appendix, Fig. S3**), most notably the second histidine, which serves as the catalytic  
349 histidine in the condensation reaction (84).

350

351 **Stereochemical and structural confirmation based on sequence information.** KR domains  
352 are NADPH-dependent enzymes that belong to the short-chain dehydrogenase superfamily, with  
353 Rossmann-like folds for co-factor binding (60, 88). Enzymatically, the two KR subtypes, A-Type  
354 and B-type, are responsible for stereoselective reduction of  $\beta$ -keto groups and can also  
355 determine the stereochemistry of  $\alpha$ -substituents. C-type KRs, however, lack reductase activity  
356 and often serve as epimerases. A-Type KRs have a key tryptophan residue in the active site, do  
357 not possess the LDD amino acid motif, and result in the reduction of  $\beta$ -carbonyls to L-configured  
358 hydroxy groups (60). B-Type, which are identified by the presence of an LDD amino acid motif,  
359 result in formation of D-configured hydroxy groups (60). The stereochemistry observed in  
360 palmerolide A is reflected in the active site sequence information for the D-configured hydroxyl  
361 groups from module 5 and module 11 (**Fig. 1** and **Fig. 2**). When an enzymatically active DH  
362 domain is within the same module, the stereochemistry of the *cis*- versus *trans*-olefin can be  
363 predicted, as the combination of an A-Type KR with a DH results in a *cis*-olefin formation and the  
364 combination of a B-Type KR with a DH results in *trans*-olefin formation. The *trans*- $\alpha,\beta$ -olefins  
365 arising from module 7 ( $\Delta^{14}$ ), module 10 ( $\Delta^8$ ), and module 13 ( $\Delta^2$ ) arise from B-Type KRs and  
366 active DHs. The other three olefins present in the structure of palmerolide A, as noted above,  
367 likely have positional and stereochemical influence during the enzymatic shifts to the  $\beta,\gamma$ -  
368 positions ( $\Delta^{21}$  and  $\Delta^{23}$ ) or from the ECH domain (module 6).

369 Additional structural information was obtained through defining the specificity of KS  
370 domains using phylogenetic analysis and the *trans*-AT PKS Polyketide Predictor (*trans*ATor)  
371 bioinformatic tool (89). KS domains catalyze the sequential two-carbon elongation steps through  
372 a Claisen-like condensation with a resulting  $\beta$ -keto feature (90). Additional domains within a given  
373 module can modify the  $\beta$ -carbonyl or add functionality to the adjacent  $\alpha$ - or  $\gamma$ -positions (60).  
374 Specificity of KSs, based the types of modification located on the upstream acetate subunit were  
375 determined and were found to be mostly consistent with the retrobiosynthetic predictions (**SI**  
376 **Appendix, Fig. S4, SI Appendix, Table S1**). For example, the first KS, KS1 (module 1), is  
377 predicted to receive a subunit containing a  $\beta$ -branch. KS3 (module 4) and KS4 (module 5) are  
378 predicted to receive an upstream monomeric unit with  $\alpha$ -methylation and an olefinic shift,  
379 consistent with the structure of palmerolide A and with the enzymatic transformations resulting  
380 from module 3 and module 4, respectively. Interestingly, the KS associated with the HCS  
381 cassette is in a clade of its own in the phylogenetic tree. *Trans*ATor also aided in confirming the  
382 stereochemical outcomes of the hydroxy groups and olefins, which occur through reduction of the  
383  $\beta$ -carbonyls. The predictions for the D-configured hydroxy groups were consistent with not only  
384 the presence of the LDD motif, indicative of type B-type KR as outlined above, but also with  
385 stereochemical determination based on the clades of the KS domains of the receiving modules,  
386 KS5 (module 6) and KS11 (module 12). They are also consistent with the structure of palmerolide  
387 A. The KS predictions, however, did not aid in confirming reduction of the upstream olefins for  
388 KS8 (module 9) and KS12 (module 13).

389

390 **Additional *trans*-acting domains and domains between genes responsible for**  
391 **biosynthesis.** A glycosyl transferase (*palP*) and lactone oxidase (*palH*) that are associated with  
392 glycosylation of polyketides are encoded in the palmerolide A BGC (**Fig. 2**), though glycosylated  
393 palmerolides have not been observed. Glycosylation as a means of self-resistance has been  
394 described for oleandomycin, which encodes not only two glycosyl transferases, one with  
395 substrate specificity toward oleandomycin and the other relaxed specificity, but also a glycosyl  
396 hydrolase (91, 92). The glycosylation of the macrolide confers internal resistance to ribosomal  
397 inhibition, making the glycosylated macrolide a pro-drug, which is activated by the glycosyl  
398 hydrolase that is excreted extracellularly (91, 92). Glycosyl transferases are found in other  
399 macrolide- and non-macrolide-producing organisms as a means to inactivate hydroxylated  
400 polyketides (93, 94). Though prokaryotic V-ATPases tend to be simpler than those of eukaryotes,



401 there is homology in the active sites making the pro-drug hypothesis for self-resistance  
402 reasonable in palmerolide A biosynthesis (95). The D-arabinono-1,4-lactone oxidase (*palH*) is a  
403 FAD-dependent oxidoreductase that likely works in concert with the glycosyltransferase. An ATP-  
404 binding cassette (ABC) transporter is encoded between the core biosynthetic genes and the  
405 genes for the *trans*-acting enzymes. This transporter, which has homology to SryD and contains  
406 the key nucleotide-binding domain GGNGSGKST, may be responsible for the translocation of the  
407 macrolide out of the cell. Since it is housed within the BGC, it is likely under the same regulatory  
408 control. Additionally, a Band7 protein is encoded. Band7 proteins belong to a ubiquitous family of  
409 slipin or stomatin-like integral membrane proteins that are found in all kingdoms, yet lack  
410 assignment of function (96). A domain of unknown function (DUF) is annotated; however, this  
411 particular DUF, DUF179, has no superfamily relatives in protein homology searches. Together,  
412 these *trans*-acting domains decorate the carbon backbone with features that give palmerolide A  
413 its unique chemical structure and contribute to its bioactivity.

414

### 415 C. Multiple copies of the *pal* Biosynthetic Gene Cluster Explain Structural Variants in the 416 Palmerolide Family

417

418 Careful assembly of the metagenome assembled genome (MAG) of *Ca. S. palmerolidicus*  
419 revealed the BGC was present in multiple copies (**Fig. 4** and **SI Appendix, Fig. S5-S7**) (44),  
420 evidenced by their independent anchoring loci within the MAG and supported by a five-fold  
421 increase in depth of coverage relative to the rest of the genome. The structural complexity of the  
422 multicopy BGCs represents a biosynthetic system that is similar to that which is found in *Ca.*  
423 *Didemnitutus mandela*, another ascidian-associated verrucomicrobium in the family *Opitutaceae*  
424 (71). A total of 5 distinct BGCs consistent with Type-I PKS systems that have much overlap with  
425 one another and are likely responsible for much of the structural diversity in the family of  
426 palmerolides (17, 18) (**Fig. 4**). Palmerolide A is hypothesized to arise from the BGC designated  
427 as *pal* BGC 4 with additional compounds also from this same cluster. The clusters designated as  
428 *pal* BGC 1, *pal* BGC 2, *pal* BGC 3, and *pal* BGC 5 have been identified in *Ca. S. palmerolidicus*  
429 and the potential products of each are described below. It is hypothesized that there are three  
430 levels of diversity introduced to create the family of palmerolides: (1) differences in the site of  
431 action for the *trans*-acting domains (with additional *trans*-acting domains at play as well), (2)  
432 promiscuity of the initial selection of the starter subunit, and (3) differences in the core  
433 biosynthetic genes with additional PKS domains or stereochemical propensities within a module.

434 There are several palmerolides that likely arise from the same BGC encoding the  
435 megaenzyme responsible for palmerolide A (*pal* BGC 4). We hypothesize that the *trans*-acting  
436 domains have different sites of action than what is seen in palmerolide A biosynthesis. For  
437 example, the chemical scaffold of palmerolide B (**Fig. 4**) is similar to palmerolide A, though the  
438 carbamate transfer occurs on the C-7 hydroxy group. Palmerolide B instead bears a sulfate group  
439 on the C-11 hydroxy group; proteins with homology to multiple types of sulfatases from the  
440 UniProtKB database (P51691, P15289, O69787, Q8ZQJ2) are found in the genome of *Ca. S.*  
441 *palmerolidicus* (44), but are not encoded within the BGCs. One of these *trans*-acting sulfatases  
442 likely modifies the molecule post-translationally. Other structural differences including the  
443 hydroxylation on C-8 instead of C-10 (as observed in palmerolide A) and the  $\Delta^9$  olefin that differs  
444 from palmerolide A's  $\Delta^8$  olefin, are either due to a difference of the site of action of the LLM  
445 (module 9) or a *trans*-acting hydroxylase. Another member of the compound family, palmerolide  
446 C, has structural differences attributable to *trans*-acting enzymes as well. Again, a *trans*-acting  
447 hydroxylase or the LLM is proposed to be responsible for hydroxylation on C-8. A hydroxy group  
448 on C-9 occurs through reduction of the carbonyl. The carbamate installation occurs on C-11 after  
449 *trans*-acting hydroxylation or LLM hydroxylation. In addition, the  $\Delta^8$  olefin in palmerolide A is not  
450 observed, but rather a  $\Delta^6$  olefin.

451 Additional levels of structural variation are seen at the site of the starter unit, likely due to  
452 a level of enzymatic promiscuity of the second AT (PalF). This, combined with differences in the  
453 sites of action for the *trans*-acting domains, is likely responsible for the structural differences  
454 observed in palmerolide F (**Fig. 4**). The terminal olefin on the tail of the macrolide which perhaps

455 is a product of promiscuity of the selection of the starter unit, the isomeric 3-methyl-3-butenic  
456 acid, is consistent with the aforementioned lack of consensus for malonate selection by the AT. In  
457 addition, the KS that receives the starter unit is phylogenetically distinct from the other KS in the  
458 *pal* clusters (**SI Appendix, Fig. S4**).

459 The retrobiosynthetic hypothesis for palmerolide G (**Fig. 4**) has much similarity to what is  
460 present in *pal* BGC 4; however, the presence of a *cis*-olefin rather than a *trans*-olefin could arise  
461 from a difference in the enzymatic activity of module 4. This olefin is the result of a shift from an  
462 epimerase and, therefore, the stereochemistry is not solely reliant upon the action of the  
463 associated KR. Although this difference has not been identified in the BGCs in the samples  
464 sequenced, this could be present in other environmental samples that have been batched for  
465 processing and compound isolation. Currently, the biosynthetic mechanism is unknown.

466 The core biosynthetic genes of two palmerolide BGCs (*pal* BGC 1 and *pal* BGC 3) are  
467 identical to one another (**SI Appendix, Fig. S5**) and possess an additional elongation module  
468 when compared to *pal* BGC 4. Palmerolide D (**Fig. 4**) is structurally very similar to palmerolide A  
469 with the exception of elongation in the carboxylate tail of the macrolide by an isopropyl group.  
470 This could arise from one additional round of starter unit elongation via a KS and methylation.  
471 These two identical BGCs are consistent with this structural difference. The overall architecture  
472 and stereochemistry are otherwise maintained. Palmerolide H (**Fig. 4**) includes the structural  
473 differences of both palmerolide B and palmerolide D. It contains the extended carboxylate tail with  
474 a terminal olefin and incorporates hydroxylation on C-8 rather than C-10. Again, there is no  
475 genomic evidence that this hydroxylation in the  $\alpha$ -position is due to incorporation of  
476 hydroxymalonate to explain this but is instead likely due to a *trans*-hydroxylase. The carbamate  
477 installation occurs on C-7, while sulfonation occurs on C-11 and  $\alpha$ -hydroxy placement is on C-8.

478 The final two palmerolide BGCs both have truncation of the core biosynthetic genes. The  
479 gene structure of *pal* BGC 5 (**SI Appendix, Fig. S6**) shows preservation of genes upstream to the  
480 core biosynthetic genes; however, there are no pre-NRP PKS modules noted in the BGC. The  
481 HCS cassette, glycosyl transferase, and CT are all present downstream. The predicted product of  
482 this cluster does not align with a known palmerolide, though post-translational hydrolysis of the C-  
483 24 amide may result in a structure similar to palmerolide E (**Fig. 4**), which maintains much of the  
484 structure of palmerolide A; however, is missing the initial polyketide starter unit and the glycine  
485 subunit. The final *pal* BGC in *Ca. S. palmerolidicus*, *pal* BGC 2 (**SI Appendix, Fig. S7**), includes  
486 only 5 elongating modules, which would result in a 10-carbon structure that has not been  
487 observed. Interestingly, despite the shortened BGC, the HCS cassette, glycosyl transferase, and  
488 CT are all present downstream. There would only be a single hydroxy group serving as a  
489 substrate for the CT, glycosyl transferase, and sulfatase to act. The 2-carbon site of action for the  
490  $\beta$ -branch introduced in the palmerolide A structures would not be present. The structure-based  
491 retrobiosynthesis of the eight known palmerolides (A-F) can be hypothesized to arise from  
492 differences in the core biosynthetic genes of these non-identical copies of the *pal* BGC, starter  
493 unit promiscuity, and differing sites of action in the *trans*-acting enzymes.

494

495

## 496 Conclusion

497

498 The putative *pal* BGC has been identified and represents the first BGC elucidated from an  
499 Antarctic organism. As outlined in a retrobiosynthetic strategy, the *pal* BGC represents a *trans*-AT  
500 Type I PKS/NRPS hybrid system with compelling alignment to the predicted biosynthetic steps for  
501 palmerolide A. The *pal* BGC is proposed to begin with PKS modules resulting in the incorporation  
502 of an isovaleric acid derivative, 3-methylcrotonic acid, as a starter unit, followed by incorporation  
503 of a glycine residue with NRPS-type modules. Then, eleven rounds of progressive polyketide  
504 elongation likely occur leading to varying degrees of oxidation introduced with each module.  
505 There are several interesting non-canonical domains encoded within the BGC, such as an HCS,  
506 CT, LLM, and a truncated condensation termination domain. Additionally, a glycosylation domain  
507 may be responsible for reversible, pro-drug formation to produce self-resistance to the V-ATPase

508 activity of palmerolide A. There are additional domains, the function of which have yet to be  
509 determined.

510 A combination of modular alterations, starter unit differences, and activity of *trans*-acting  
511 enzymes contributes to Nature's production of a suite of palmerolide analogues. There are a total  
512 of five distinct *pal* BGCs in the MAG of *Ca. S. palmerolidicus*, yielding the known eight  
513 palmerolides, with genetic differences that explain some of the structural variety seen within this  
514 family of compounds. These include differences in modules that comprise the core biosynthetic  
515 genes. Additionally, it is proposed that some of the architectural diversity of palmerolides arises  
516 from different sites of action of the *trans*-acting, or non-colinear, modules. Starter unit promiscuity  
517 is another potential source of the structural differences observed in the compounds. Analysis of  
518 the *pal* BGC not only provides insight into the architecture of this Type I PKS/NRPS hybrid BGC  
519 with unique features, but also lays the foundational groundwork for drug development studies of  
520 palmerolide A via heterologous expression.

521

522

523

## 524 **Materials and Methods**

525

526 The details of field collections, sample processing and genomic methods (sequencing,  
527 assembly, and analysis) used to identify the putative biosynthetic gene clusters are described in  
528 detail in two related publications (35, 44). In brief, *Synoicum adareanum* samples were collected  
529 by SCUBA from the Antarctic Peninsula in the Anvers Island Archipelago and flash frozen.  
530 Microbial cells were separated from host tissue using a homogenization protocol established for  
531 this holobiont followed by differential centrifugation to separate the host cellular debris and  
532 microbial cells (31). The metagenome assembled genome (MAG) sequence analyzed in this  
533 study was generated from two *S. adareanum* samples (Bon-1c-2011 and Del-2b-2011) with high  
534 copy numbers of the putative biosynthetic gene cluster sequenced using PacBio technology. The  
535 resulting assembly of produced a nearly complete 4.3 MB genome, with five unique contigs and  
536 five varying copies of the *pal* BGC (referred to as *pal* BGC 1 through *pal* BGC 5) (44). Given the  
537 phylogenomic novelty of the MAG, the name *Candidatus Synoicohabitans palmerolidicus* was  
538 proposed for this new genus in the *Opitutaceae* family (Verrucomicrobia phylum).

539 The methods employed in this study used bioinformatic tools to develop predictive models  
540 of palmerolide biosynthesis. Enzymatic reactions and organic synthetic interpretations were  
541 based on homology analyses. Automated annotation and manual bioinformatic tools were used to  
542 discern the details of palmerolide A biosynthesis in addition to generating predictions for the other  
543 BGCs. The *Ca. S. palmerolidicus* MAG was annotated using antiSMASH (v. 5.0) (51) using the  
544 full complement of annotation options available. Then we predicted the gene cluster responsible  
545 for palmerolide A biosynthesis using retrobiosynthetic predictions focused on the 5' end of the  
546 BGCs (Fig. 1). Only one of the five BGCs met the criteria for a non-ribosomal peptide glycine  
547 starter unit. The annotation predictions were integrated and validated with results of additional  
548 protein family homology analysis, conserved domain searches, active site and motif identification  
549 to predict the step-wise biosynthesis of palmerolide A. Manual annotation of the *pal* BGC  
550 sequences included BLASTP searches to confirm enzymatic identities, then protein family  
551 alignments were used to identify active site residues key for stereochemical outcomes, confirm  
552 substrate affinities, and other biochemical synthesis details.

553 Additional manual bioinformatic efforts included obtaining BGCs from public NCBI  
554 databases for basiliskamide, bryostatin 1, calyculin, corallopyronin, mandelalide, onnamide,  
555 oxazolamycin, pederin, phormidolide, psymberin, sorangicin, and myxoviricin (**SI Appendix,**  
556 **Table S2**). ClustalO alignment tool in the CLC Genome Workbench (QIAGEN aarhus A/S v.  
557 20.0.3) was used for multiple sequence alignments of enzymatic domains with HMM Pfam Seeds  
558 obtained from EMBL-EBI and the amino acid sequences from the other PKS BGCs. MIBiG (97)  
559 was used to acquire the KS amino acid sequence from the type III PKS BGC responsible for 3-  
560 (2'-hydroxy-3'-oxo-4'-methylpentyl)-indole biosynthesis from *Xenorhabdus bovienii* SS-2004  
561 (GenBank Accession: FN667741.1), which was used for an outgroup. The *pal* BGC ACPs and

562 PCPs were numbered according to their position in the proposed biosynthesis of palmerolide A  
563 (**SI Appendix, Fig. S1 and S2**). The BGC KSs were numbered according to their position in their  
564 proposed biosynthesis in the literature. Prior to the construction of the phylogenetic tree for the  
565 KS domains (**SI Appendix, Fig. S4**), the sequences in the alignment were manually inspected  
566 and trimmed. Phylogenetic trees were created in the CLC Genome Workbench (QIAGEN Aarhus  
567 A/S v. 20.0.3) with Neighbour Joining (NJ) as a distance method and Bayesian estimation for  
568 ACP and PCP comparisons as well as for KS analysis. Jukes-Cantor was selected for the genetic  
569 distance model and bootstrapping with performed with 100 replicates. Additionally, the sequence  
570 of each KS in the *pal* BGCs was queried using the *trans*-AT PKS Polyketide Predictor (*trans*ATor)  
571 to help define the specificity of KS domains. The software is based on phylogenetic analyses of  
572 fifty-four *trans*-AT type I PKS systems with 655 KS sequences and the resulting clades are  
573 referenced to help predict the KS specificity for the upstream unit (89).

574

## 575 Data Deposition

576

577 Data from this project has been deposited to the NCBI under BioProject Accession Number  
578 PRJNA662631. The GenBank Accession Number for the MAG of *Ca. Synoicohabitan*  
579 *palmerolidicus* is JAGGDC000000000. The BGCs can be accessed in the MiBIG database with  
580 the associated Accession Numbers: BGC0002118 (for *pal* BGC 4) and BGC0002119 (for *pal*  
581 BGC 3).

582

## 583 Acknowledgments

584

585 Support for this research was provided in part by the National Institutes of Health award  
586 (CA205932) to A.E.M., B.J.B., and P.S.G.C., with additional support from National Science  
587 Foundation awards (ANT-0838776, and PLR-1341339 to B.J.B., ANT-0632389 to A.E.M.) The  
588 authors acknowledge the assistance of field team members, including William Dent, Charles D.  
589 Amsler, James B. McClintock, Margaret O. Amsler, and Katherine Schoenrock. This work would  
590 not have been possible without the outstanding logistical support of the United States Antarctic  
591 Program. Lucas Bishop, Robert Read, and Mary L. Higham are also recognized for their  
592 contributions.

593

594

595

## 596 References

597

- 598 1. A. R. Carroll, B. R. Copp, R. A. Davis, R. A. Keyzers, M. R. Prinsep, Marine natural  
599 products. *Nat. Prod. Rep.* **36**, 122–173 (2019).
- 600 2. C. A. Dejong, *et al.*, Polyketide and nonribosomal peptide retro-biosynthesis and global  
601 gene cluster matching. *Nat. Chem. Biol.* **12**, 1007–1014 (2016).
- 602 3. J. G. Lawrence, H. Ochman, M. A. Ragan, Reconciling the many faces of lateral gene  
603 transfer. *Trends Microbiol.* **10**, 1–4 (2002).
- 604 4. M. Ravenhall, N. Škunca, F. Lassalle, C. Dessimoz, Inferring Horizontal Gene Transfer.  
605 *PLoS Comput. Biol.* **11**, 1–16 (2015).
- 606 5. I. Schmitt, H. T. Lumbsch, Ancient horizontal gene transfer from bacteria enhances  
607 biosynthetic capabilities of fungi. *PLoS One* **4**, 1–8 (2009).
- 608 6. E. W. Schmidt, Trading molecules and tracking targets in symbiotic interactions. *Nat.*  
609 *Chem. Biol.* **4**, 466–473 (2008).
- 610 7. E. W. Schmidt, The secret to a successful relationship: Lasting chemistry between  
611 ascidians and their symbiotic bacteria. *Invertebr. Biol.* **134**, 88–102 (2015).
- 612 8. E. J. N. Helfrich, J. Piel, Biosynthesis of polyketides by *trans*-AT polyketide synthases.  
613 *Nat. Prod. Rep.* **33**, 231–316 (2016).
- 614 9. A. M. P. Koskinen, K. Karisalmi, Polyketide stereotetrads in natural products. *Chem. Soc.*  
615 *Rev.* **34**, 677–690 (2005).

- 616 10. J. Napolitano, A. Daranas, M. Norte, J. Fernandez, Marine Macrolides, a Promising  
617 Source of Antitumor Compounds. *Anticancer. Agents Med. Chem.* **9**, 122–137 (2012).
- 618 11. R. Ueoka, *et al.*, Metabolic and evolutionary origin of actin-binding polyketides from  
619 diverse organisms. *Nat. Chem. Biol.* **11**, 705–712 (2015).
- 620 12. M. E. Bordeleau, *et al.*, Stimulation of mammalian translation initiation factor eIF4A activity  
621 by a small molecule inhibitor of eukaryotic translation. *Proc. Natl. Acad. Sci. U. S. A.* **102**,  
622 10460–10465 (2005).
- 623 13. S. Nishimura, *et al.*, Structure-activity relationship study on 13-deoxytedanolide, a highly  
624 antitumor macrolide from the marine sponge *Mycale adhaerens*. *Bioorganic Med. Chem.*  
625 **13**, 455–462 (2005).
- 626 14. R. Shen, C. T. Lin, E. J. Bowman, B. J. Bowman, J. A. Porco, Lobatamide C: Total  
627 synthesis, stereochemical assignment, preparation of simplified analogues, and V-ATPase  
628 inhibition studies. *J. Am. Chem. Soc.* **125**, 7889–7901 (2003).
- 629 15. E. J. Bowman, K. R. Gustafson, B. J. Bowman, M. R. Boyd, Identification of a New  
630 Chondropsin Class of Antitumor Compound that Selectively Inhibits V-ATPases. *J. Biol.*  
631 *Chem.* **278**, 44147–44152 (2003).
- 632 16. S. Kazami, *et al.*, Iejimalides show anti-osteoclast activity via V-ATPase inhibition. *Biosci.*  
633 *Biotechnol. Biochem.* **70**, 1364–1370 (2006).
- 634 17. T. Diyabalanage, C. D. Amsler, J. B. McClintock, B. J. Baker, Palmerolide A, a cytotoxic  
635 macrolide from the antarctic tunicate *Syonicum adareanum*. *J. Am. Chem. Soc.* **128**,  
636 5630–5631 (2006).
- 637 18. J. H. Noguez, *et al.*, Palmerolide macrolides from the Antarctic tunicate *Syonicum*  
638 *adareanum*. *Bioorganic Med. Chem.* **19**, 6608–6614 (2011).
- 639 19. B. Shen, *et al.*, Polyketide biosynthesis beyond the type I, II, and III polyketide synthase  
640 paradigms: A progress report. *ACS Symp. Ser.* **955**, 154–166 (2007).
- 641 20. B. Wilkinson, *et al.*, Novel octaketide macrolides related to 6-deoxyerythronolide B provide  
642 evidence for iterative operation of the erythromycin polyketide synthase. *Chem. Biol.* **7**,  
643 111–117 (2000).
- 644 21. S. Tatsuno, K. Arakawa, H. Kinashi, Analysis of Modular-iterative Mixed Biosynthesis of  
645 Lankacidin by Heterologous Expression and Gene Fusion. *J. Antibiot. (Tokyo)*. **60**, 700–  
646 708 (2007).
- 647 22. B. Wang, F. Guo, C. Huang, H. Zhao, Unraveling the iterative type I polyketide synthases  
648 hidden in *Streptomyces*. *Proc. Natl. Acad. Sci. U. S. A.* **117**, 8449–8454 (2020).
- 649 23. T. A. Nguyen, *et al.*, Exploiting the mosaic structure of *trans*-acyltransferase polyketide  
650 synthases for natural product discovery and pathway dissection. *Nat. Biotechnol.* **26**, 225–  
651 233 (2008).
- 652 24. S. F. Haydock, *et al.*, Divergent sequence motifs correlated with the substrate specificity of  
653 (methyl)malonyl-CoA:acyl carrier protein transacylase domains in modular polyketide  
654 synthases. *FEBS Lett.* **374**, 246–248 (1995).
- 655 25. H. Jenke-Kodama, A. Sandmann, R. Müller, E. Dittmann, Evolutionary implications of  
656 bacterial polyketide synthases. *Mol. Biol. Evol.* **22**, 2027–2039 (2005).
- 657 26. A. Nivina, K. P. Yuet, J. Hsu, C. Khosla, Evolution and Diversity of Assembly-Line  
658 Polyketide Synthases. *Chem. Rev.* **119**, 12524–12547 (2019).
- 659 27. P. Videau, K. N. Wells, A. J. Singh, W. H. Gerwick, B. Philmus, Assessment of *Anabaena*  
660 sp. Strain PCC 7120 as a Heterologous Expression Host for Cyanobacterial Natural  
661 Products: Production of Lyngbyatoxin A. *ACS Synth. Biol.* **5**, 978–988 (2016).
- 662 28. E. J. Kim, *et al.*, Heterologous Production of 4-O-Demethylbarbamide, a Marine  
663 Cyanobacterial Natural Product. *Org. Lett.* **14**, 5824–5827 (2012).
- 664 29. C. Greunke, *et al.*, Direct Pathway Cloning (DiPaC) to unlock natural product biosynthetic  
665 potential. *Metab. Eng.* **47**, 334–345 (2018).
- 666 30. J. B. McClintock, C. D. Amsler, B. J. Baker, R. W. M. Van Soest, Ecology of antarctic  
667 marine sponges: An overview. *Integr. Comp. Biol.* **45**, 359–368 (2005).
- 668 31. A. Clarke, J. A. Crame, Evolutionary dynamics at high latitudes: Speciation and extinction  
669 in polar marine faunas. *Philos. Trans. R. Soc. B Biol. Sci.* **365**, 3655–3666 (2010).

- 670 32. R. M. Young, *et al.*, Site-specific variability in the chemical diversity of the Antarctic red  
671 alga *Plocamium cartilagineum*. *Mar. Drugs* **11**, 2126–2139 (2013).
- 672 33. K. D. Paull, E. Hamel, L. Malspeis, Prediction of Biochemical Mechanism of Action from  
673 the In Vitro Antitumor Screen of the National Cancer Institute. *Cancer Chemother. Agents*,  
674 9–45 (1995).
- 675 34. K. Von Schwarzenberg, *et al.*, Mode of cell death induction by pharmacological vacuolar H  
676 <sup>+</sup>-ATPase (V-ATPase) inhibition. *J. Biol. Chem.* **288**, 1385–1396 (2013).
- 677 35. A. E. Murray, *et al.*, Uncovering the Core Microbiome and Distribution of Palmerolide in  
678 *Synoicum adareanum* Across the Anvers Island Archipelago, Antarctica. *Mar. Drugs* **18**,  
679 298 (2020).
- 680 36. K. P. Kaliappan, P. Gowrisankar, Synthetic studies on a marine natural product,  
681 palmerolide A: Synthesis of C1-C9 and C15-C21 fragments. *Synlett*, 1537–1540 (2007).
- 682 37. M. P. Lisboa, D. M. Jones, G. B. Dudley, Formal synthesis of palmerolide A, featuring  
683 alkynogenic fragmentation and syn-selective vinylogous aldol chemistry. *Org. Lett.* **15**,  
684 886–889 (2013).
- 685 38. M. D. Lebar, B. J. Baker, Synthesis of the C3-14 fragment of palmerolide A using a chiral  
686 pool based strategy. *Tetrahedron* **66**, 1557–1562 (2010).
- 687 39. Z. K. Wen, Y. H. Xu, T. P. Loh, Palladium-catalyzed cross-coupling of unactivated alkenes  
688 with acrylates: Application to the synthesis of the C13-C21 fragment of palmerolide A.  
689 *Chem. - A Eur. J.* **18**, 13284–13287 (2012).
- 690 40. S. A. Pujari, P. Gowrisankar, K. P. Kaliappan, A shimizu non-aldol approach to the formal  
691 total synthesis of palmerolide A. *Chem. - An Asian J.* **6**, 3137–3151 (2011).
- 692 41. K. R. Prasad, A. B. Pawar, Stereoselective synthesis of C1-C18 region of palmerolide A  
693 from tartaric acid. *Synlett* **4**, 1093–1095 (2010).
- 694 42. A. B. Pawar, K. R. Prasad, Formal total synthesis of palmerolide A. *Chem. - A Eur. J.* **18**,  
695 15202–15206 (2012).
- 696 43. C. S. Riesenfeld, A. E. Murray, B. J. Baker, Characterization of the microbial community  
697 and polyketide biosynthetic potential in the palmerolide-producing tunicate *Synoicum*  
698 *adareanum*. *J. Nat. Prod.* **71**, 1812–1818 (2008).
- 699 44. A. E. Murray, *et al.*, Discovery of an Antarctic ascidian-associated uncultivated  
700 Verrucomicrobia that encodes antimelanoma palmerolide biosynthetic capacity. *BioRxiv*.  
701 (Preprint: 10.1101/2021.05.05.442870) (2021).
- 702 45. W. Mattheus, *et al.*, Isolation and Purification of a New Kalimantacin/Batumin-Related  
703 Polyketide Antibiotic and Elucidation of Its Biosynthesis Gene Cluster. *Chem. Biol.* **17**,  
704 149–159 (2010).
- 705 46. S. Sudek, *et al.*, Identification of the putative bryostatin polyketide synthase gene cluster  
706 from “*Candidatus Endobugula sertula*”, the uncultivated microbial symbiont of the marine  
707 bryozoan *Bugula neritina*. *J. Nat. Prod.* **70**, 67–74 (2007).
- 708 47. D. J. Edwards, *et al.*, Structure and Biosynthesis of the Jamaicamides, New Mixed  
709 Polyketide-Peptide Neurotoxins from the Marine Cyanobacterium *Lyngbya majuscula*.  
710 *Chem. Biol.* **11**, 817–833 (2004).
- 711 48. Z. Chang, *et al.*, Biosynthetic Pathway and Gene Cluster Analysis of Curacin A, an  
712 Antitubulin Natural Product from the Tropical Marine Cyanobacterium *Lyngbya majuscula*  
713 †. *J. Nat. Prod.* **67**, 1356–1367 (2004).
- 714 49. M. A. Matilla, H. Stöckmann, F. J. Leeper, G. P. C. Salmond, Bacterial biosynthetic gene  
715 clusters encoding the anti-cancer haterumalide class of molecules: Biogenesis of the  
716 broad spectrum antifungal and anti-oomycete compound, oocydin A. *J. Biol. Chem.* **287**,  
717 39125–39138 (2012).
- 718 50. K. M. Fisch, *et al.*, Polyketide assembly lines of uncultivated sponge symbionts from  
719 structure-based gene targeting. *Nat. Chem. Biol.* **5**, 494–501 (2009).
- 720 51. K. Blin, *et al.*, antiSMASH 5.0: updates to the secondary metabolite genome mining  
721 pipeline. *Nucleic Acids Res.* **47**, W81–W87 (2019).
- 722 52. T. A. M. Gulder, M. F. Freeman, J. Piel, The Catalytic Diversity of Multimodular Polyketide  
723 Synthases: Natural Product Biosynthesis Beyond Textbook Assembly Rules (2011)

- 724 [https://doi.org/10.1007/128\\_2010\\_113](https://doi.org/10.1007/128_2010_113).
- 725 53. M. J. Bertin, *et al.*, The Phormidolide Biosynthetic Gene Cluster: A *trans*-AT PKS Pathway  
726 Encoding a Toxic Macrocyclic Polyketide. *ChemBioChem* **17**, 164–173 (2016).
- 727 54. C. D. Reeves, *et al.*, Alteration of the substrate specificity of a modular polyketide  
728 synthase acyltransferase domain through site-specific mutations. *Biochemistry* **40**, 15464–  
729 15470 (2001).
- 730 55. G. Yadav, R. S. Gokhale, D. Mohanty, Computational approach for prediction of domain  
731 organization and substrate specificity of modular polyketide synthases. *J. Mol. Biol.* **328**,  
732 335–363 (2003).
- 733 56. B. J. Dunn, K. R. Watts, T. Robbins, D. E. Cane, C. Khosla, Comparative analysis of the  
734 substrate specificity of *trans*- versus *cis*-acyltransferases of assembly line polyketide  
735 synthases. *Biochemistry* **53**, 3796–3806 (2014).
- 736 57. A. L. Díaz-Pérez, C. Díaz-Pérez, J. Campos-García, Bacterial l-leucine catabolism as a  
737 source of secondary metabolites. *Rev. Environ. Sci. Bio/Technology* **15**, 1–29 (2016).
- 738 58. T. Mahmud, *et al.*, A novel biosynthetic pathway providing precursors for fatty acid  
739 biosynthesis and secondary metabolite formation in myxobacteria. *J. Biol. Chem.* **277**,  
740 32768–32774 (2002).
- 741 59. M. Röttig, *et al.*, NRPSpredictor2 - A web server for predicting NRPS adenylation domain  
742 specificity. *Nucleic Acids Res.* **39**, 362–367 (2011).
- 743 60. A. T. Keatinge-Clay, The structures of type I polyketide synthases. *Nat. Prod. Rep.* **29**,  
744 1050 (2012).
- 745 61. Ö. Erol, *et al.*, Biosynthesis of the myxobacterial antibiotic coralopyronin A.  
746 *ChemBioChem* **11**, 1253–1265 (2010).
- 747 62. C. Zhao, *et al.*, Oxazolomycin biosynthesis in *Streptomyces albus* JA3453 featuring an  
748 “acyltransferase-less” type I polyketide synthase that incorporates two distinct extender  
749 units. *J. Biol. Chem.* **285**, 20097–20108 (2010).
- 750 63. H. Irschik, *et al.*, Analysis of the sorangicin gene cluster reinforces the utility of a combined  
751 phylogenetic/retrobiosynthetic analysis for deciphering natural product assembly by *trans*-  
752 AT PKS. *ChemBioChem* **11**, 1840–1849 (2010).
- 753 64. D. C. Cantu, Y. Chen, P. J. Reilly, Thioesterases: A new perspective based on their  
754 primary and tertiary structures. *Protein Sci.* **19**, 1281–1295 (2010).
- 755 65. J. Moldenhauer, *et al.*, The Final Steps of Bacillaene Biosynthesis in *Bacillus*  
756 *amyloliquefaciens* FZB42: Direct Evidence for  $\beta,\gamma$  Dehydration by a *trans*-Acyltransferase  
757 Polyketide Synthase. *Angew. Chemie* **122**, 1507–1509 (2010).
- 758 66. G. Berkhan, C. Merten, C. Holec, F. Hahn, The Interplay between a Multifunctional  
759 Dehydratase Domain and a C-Methyltransferase Effects Olefin Shift in Ambruticin  
760 Biosynthesis. *Angew. Chemie - Int. Ed.* **55**, 13589–13592 (2016).
- 761 67. C. Hertweck, The biosynthetic logic of polyketide diversity. *Angew. Chemie - Int. Ed.* **48**,  
762 4688–4716 (2009).
- 763 68. J. Moldenhauer, X. H. Chen, R. Borriss, J. Piel, Biosynthesis of the antibiotic bacillaene,  
764 the product of a giant polyketide synthase complex of the *trans*-AT family. *Angew. Chemie*  
765 *- Int. Ed.* **46**, 8195–8197 (2007).
- 766 69. T. Wakimoto, *et al.*, Calyculin biogenesis from a pyrophosphate protoxin produced by a  
767 sponge symbiont. *Nat. Chem. Biol.* **10**, 648–655 (2014).
- 768 70. E. Esquenazi, *et al.*, Visualizing the spatial distribution of secondary metabolites produced  
769 by marine cyanobacteria and sponges via MALDI-TOF imaging. *Mol. Biosyst.* **4**, 562–570  
770 (2008).
- 771 71. J. Lopera, I. J. Miller, K. L. McPhail, J. C. Kwan, Increased Biosynthetic Gene Dosage in a  
772 Genome-Reduced Defensive Bacterial Symbiont. *mSystems* **2** (2017).
- 773 72. T. J. Buchholz, *et al.*, Polyketide  $\beta$ -Branching in Bryostatin Biosynthesis: Identification of  
774 Surrogate Acetyl-ACP Donors for BryR, an HMG-ACP Synthase. *Chem. Biol.* **17**, 1092–  
775 1100 (2010).
- 776 73. Y. Q. Cheng, G. L. Tang, B. Shen, Type I polyketide synthase requiring a discrete  
777 acyltransferase for polyketide biosynthesis. *Proc. Natl. Acad. Sci. U. S. A.* **100**, 3149–

- 778 3154 (2003).
- 779 74. K. C. Nicolaou, *et al.*, Chemical synthesis and biological evaluation of palmerolide A  
780 analogues. *J. Am. Chem. Soc.* **130**, 10019–10023 (2008).
- 781 75. S. F. Haydock, *et al.*, Organization of the biosynthetic gene cluster for the macrolide  
782 concanamycin A in *Streptomyces neyagawaensis* ATCC 27449. *Microbiology* **151**, 3161–  
783 3169 (2005).
- 784 76. W. Chen, *et al.*, Characterization of the Polyoxin Biosynthetic Gene Cluster from  
785 *Streptomyces cacaoi* and Engineered Production of Polyoxin H. *J. Biol. Chem.* **284**,  
786 10627–10638 (2009).
- 787 77. T. K. Mihali, W. W. Carmichael, B. A. Neilan, A putative gene cluster from a *Lyngbya*  
788 *wollei* bloom that encodes paralytic shellfish toxin biosynthesis. *PLoS One* **6** (2011).
- 789 78. A. K. El-Sayed, J. Hothersall, C. M. Thomas, Quorum-sensing-dependent regulation of  
790 biosynthesis of the polyketide antibiotic mupirocin in *Pseudomonas fluorescens* NCIMB  
791 10586. *Microbiology* **147**, 2127–2139 (2001).
- 792 79. S. Maier, *et al.*, Functional characterization of different ORFs including luciferase-like  
793 monooxygenase genes from the mensacarcin gene cluster. *ChemBioChem* **16**, 1175–  
794 1182 (2015).
- 795 80. G. Lackner, E. E. Peters, E. J. N. Helfrich, J. Piel, Insights into the lifestyle of uncultured  
796 bacterial natural product factories associated with marine sponges. *Proc. Natl. Acad. Sci.*  
797 **114**, E347–E356 (2017).
- 798 81. J. J. Gehret, *et al.*, Terminal alkene formation by the thioesterase of curacin A  
799 biosynthesis: Structure of a decarboxylating thioesterase. *J. Biol. Chem.* **286**, 14445–  
800 14454 (2011).
- 801 82. L. Gu, *et al.*, Metamorphic enzyme assembly in polyketide diversification. *Nature* **459**,  
802 731–735 (2009).
- 803 83. J. Piel, A polyketide synthase-peptide synthetase gene cluster from an uncultured  
804 bacterial symbiont of Paederus beetles. *Proc. Natl. Acad. Sci. U. S. A.* **99**, 14002–14007  
805 (2002).
- 806 84. T. Stachelhaus, H. D. Mootz, V. Bergendahl, M. A. Marahiel, Peptide Bond Formation in  
807 Nonribosomal Peptide Biosynthesis. *J. Biol. Chem.* **273**, 22773–22781 (1998).
- 808 85. S. Lin, S. G. Van Lanen, B. Shen, A free-standing condensation enzyme catalyzing ester  
809 bond formation in C-1027 biosynthesis. *Proc. Natl. Acad. Sci. U. S. A.* **106**, 4183–4188  
810 (2009).
- 811 86. K. Zaleta-Rivera, *et al.*, A bidomain nonribosomal peptide synthetase encoded by FUM14  
812 catalyzes the formation of tricarballic esters in the biosynthesis of fumonisins.  
813 *Biochemistry* **45**, 2561–2569 (2006).
- 814 87. C. M. Theodore, *et al.*, Genomic and metabolomic insights into the natural product  
815 biosynthetic diversity of a feral-hog-associated *Brevibacillus laterosporus* strain. *PLoS*  
816 *One* **9**, 3–12 (2014).
- 817 88. A. T. Keatinge-Clay, R. M. Stroud, The Structure of a Ketoreductase Determines the  
818 Organization of the  $\beta$ -Carbon Processing Enzymes of Modular Polyketide Synthases.  
819 *Structure* **14**, 737–748 (2006).
- 820 89. E. J. N. Helfrich, *et al.*, Automated structure prediction of *trans*-acyltransferase polyketide  
821 synthase products. *Nat. Chem. Biol.* **15**, 813–821 (2019).
- 822 90. C. Khosla, Y. Tang, A. Y. Chen, N. A. Schnarr, D. E. Cane, Structure and Mechanism of  
823 the 6-Deoxyerythronolide B Synthase. *Annu. Rev. Biochem.* **76**, 195–221 (2007).
- 824 91. L. M. Quirós, I. Aguirrezabalaga, C. Olano, C. Méndez, J. A. Salas, Two  
825 glycosyltransferases and a glycosidase are involved in oleandomycin modification during  
826 its biosynthesis by *Streptomyces antibioticus*. *Mol. Microbiol.* **28**, 1177–1185 (1998).
- 827 92. T. A. Wenczewicz, Crossroads of Antibiotic Resistance and Biosynthesis. *J. Mol. Biol.* **431**,  
828 3370–3399 (2019).
- 829 93. G. Jenkins, E. Cundliffe, Cloning and characterization of two genes from *Streptomyces*  
830 *lividans* that confer inducible resistance to lincomycin and macrolide antibiotics. *Gene* **108**,  
831 55–62 (1991).



- 832 94. A. Gourmelen, M. H. Blondelet-Rouault, J. L. Pernodet, Characterization of a glycosyl  
 833 transferase inactivating macrolides, encoded by *gimA* from *Streptomyces ambofaciens*.  
 834 *Antimicrob. Agents Chemother.* **42**, 2612–2619 (1998).  
 835 95. K. Yokoyama, H. Imamura, Rotation, structure, and classification of prokaryotic V-  
 836 ATPase. *J. Bioenerg. Biomembr.* **37**, 405–410 (2005).  
 837 96. M. Boehm, *et al.*, Structural and mutational analysis of band 7 proteins in the  
 838 cyanobacterium *Synechocystis* sp. strain PCC 6803. *J. Bacteriol.* **191**, 6425–6435 (2009).  
 839 97. S. A. Kautsar, *et al.*, MIBiG 2.0: A repository for biosynthetic gene clusters of known  
 840 function. *Nucleic Acids Res.* **48**, D454–D458 (2020).

841

## 842 Figures

843

844

845

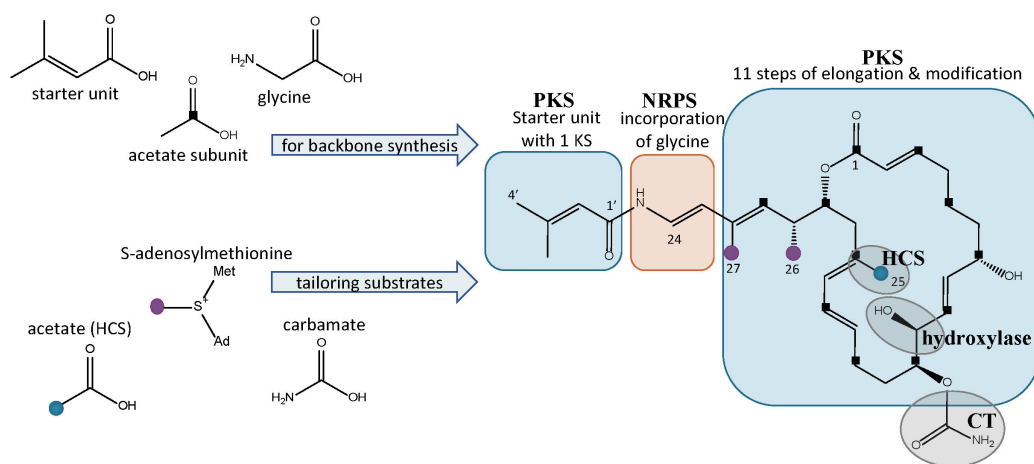

846

847

848 **Fig. 1.** Structure of palmerolide A with notations for the proposed retrobiosynthesis. Backbone  
 849 synthesis is a result of incorporation of the starter unit, a glycine residue, and acetate subunits  
 850 (C1 indicated by black squares). Structural features from *trans*-acting tailoring enzymes (indicated  
 851 by grey ovals) utilize additional substrates: methyl transfers from SAM (purple dots), installation of  
 852 C-25 methyl from acetate (blue dot) via an HCS cassette, and carbamoyl transfer to the  
 853 secondary alcohol on C-11. The  $\alpha$ -hydroxy group on C-10 is predicted to arise from incorporation  
 854 of hydroxymalonic acid or a *trans*-acting hydroxylase.  
 855

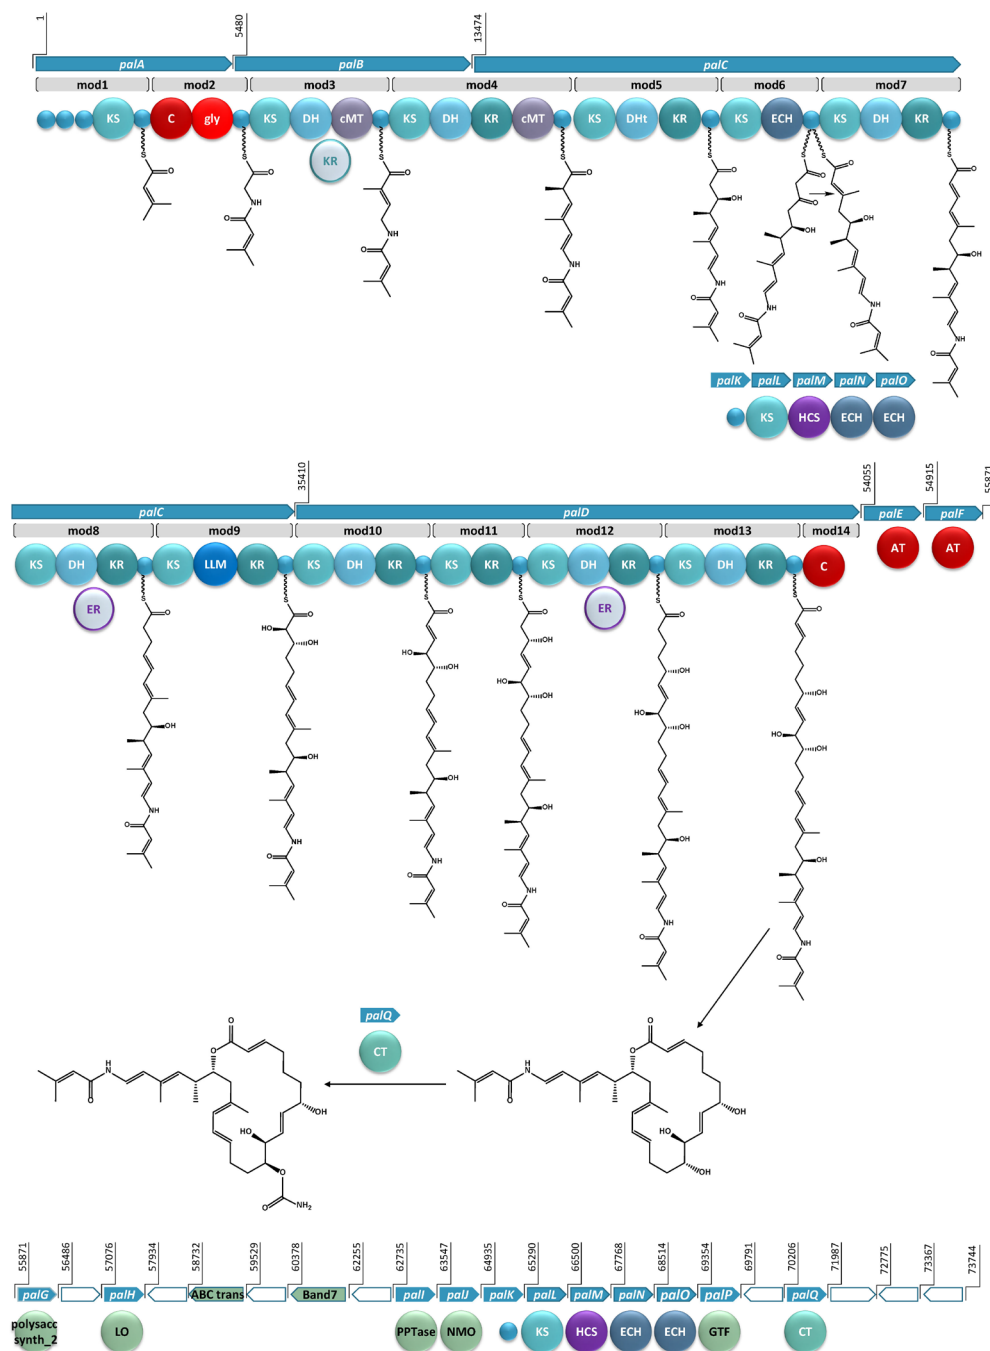

856  
857

858 **Fig. 2.** The proposed BGC for palmerolide A, showing the hybrid PKS-NRPS system. KS:  
859 ketosynthase domain, C: condensation domain, gly: adenylation domain for glycine incorporation,  
860 DH: dehydratase domain, cMT: carbon methyl transferase domain, KR: ketoreductase domain,  
861 DHt: dehydratase variant; ECH: enoyl-CoA hydratase, LLM: luciferase-like monooxygenase, AT:  
862 acyl transferase; polysacc synth\_2: polysaccharide biosynthesis protein, LO: lactone oxidase, ABC

18

863 trans: ATP-binding cassette transporter, Band7: stomatin-like integral membrane, PPTase:  
864 phosphopantetheinyl transferase, NMO: nitronate monooxygenase, HCS: hydroxymethylglutaryl-  
865 CoA synthase, GTF: glycosyl transferase ER: enoyl reductase, CT: carbamoyl transferase, small  
866 blue circles represent acyl- or peptidyl-carrier proteins. Ppant arms are symbolized by wavy lines.  
867 The grey domains indicate domains that would be expected to perform an enzymatic  
868 transformation; however, are not encoded in the BGC. Blue arrows indicate biosynthetic genes.  
869 Green arrows indicate genes that encode for non-biosynthetic proteins. White arrows reflect  
870 hypothetical genes. The BGC is displayed in reverse compliment.  
871

872

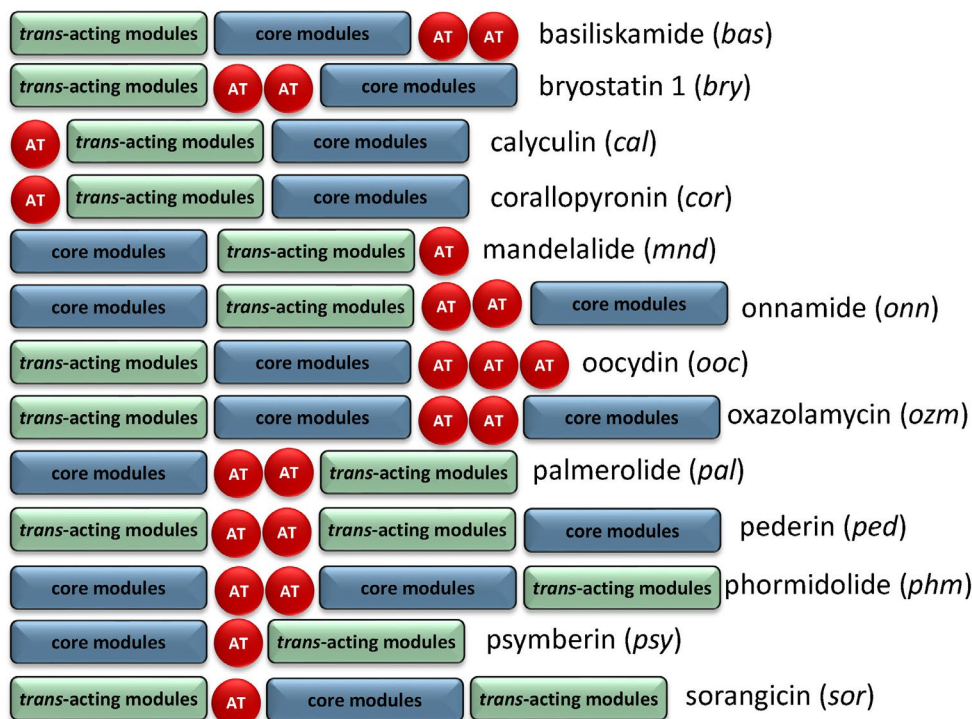

873  
874  
875  
876  
877  
878  
879

**Fig. 3.** Comparison of BGC organization of select *trans*-AT systems. There is significant variability in the order of the core modules, AT modules, and modules which contain *trans*-acting tailoring enzymes. There is also variability in the number of encoded AT modules, though the AT modules are typically encoded on separate, but tandem genes if more than one is present.

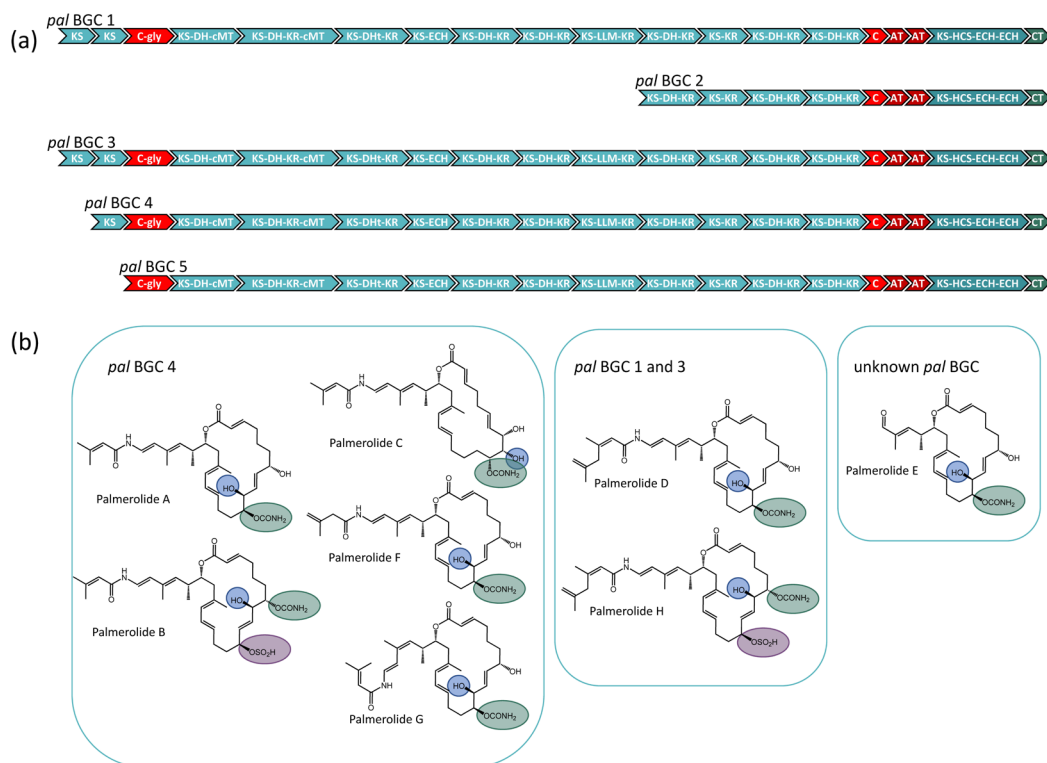

880  
881

882 **Fig. 4 (a)** Comparison of the modular structure of the 5 *pal* BGCs. **(b)** Family of palmerolides.  
 883 Much of the structural diversity can be explained by differences due to starter unit promiscuity,  
 884 sites of action for the *trans*-acting tailoring enzymes, and differences in the core modules of the  
 885 multiple *pal* BGCs. It is proposed that *pal* BGC 4 is responsible for not only palmerolide A, but  
 886 also palmerolide B, palmerolide C, palmerolide F, and palmerolide G. It is interesting to note that  
 887 the modular structure of the domains responsible for biosynthesis are equivalent for *pal* BGC 1  
 888 and *pal* BGC 3. These two BGCs contain an additional KS domain as compared to *pal* BGC 4  
 889 and are likely responsible for the biosynthesis of palmerolide D and palmerolide H.
